# Supplementary material for: FOXM1 targeting alters AURKB activity and reshapes antitumor immunity to curb the progression of small cell lung cancer
Source: Research Square preprint supplement (doi:10.21203/rs.3.rs-6960266/v1), 2025-07-01
Supplement: Supplementary file 1 [file 1373c3ce4204239f1e66ea56.pdf]

# Supplementary Figure S1

**A**

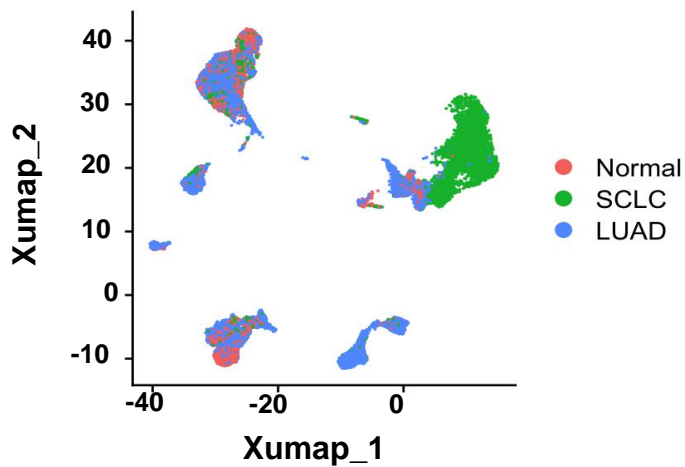

**B**

## SCLC vs Normal Differential Gene Expression

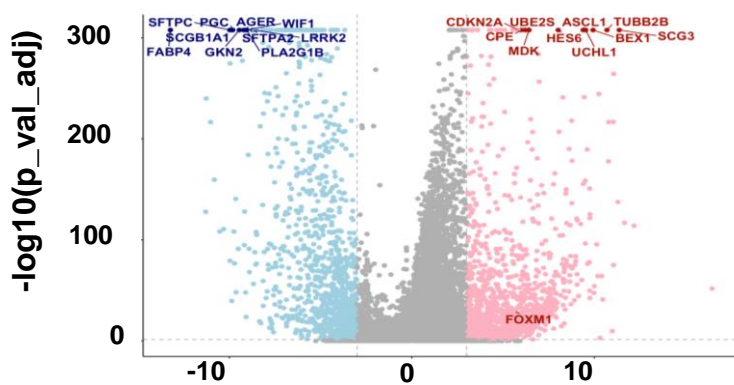

**C**

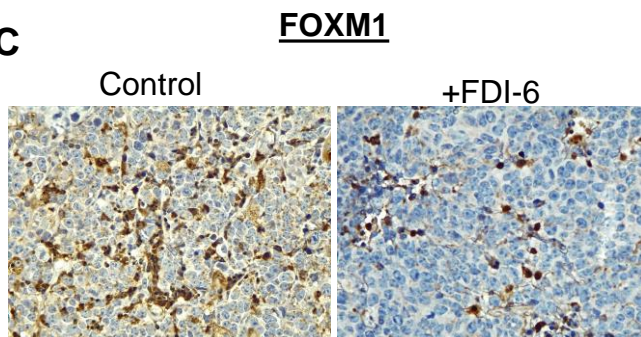

## FOXM1(RPM Lung)

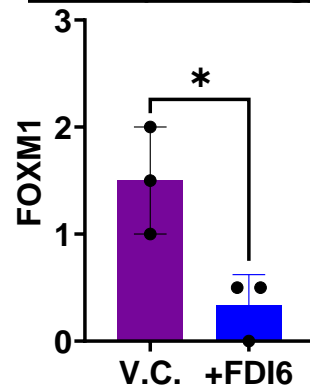

**D**

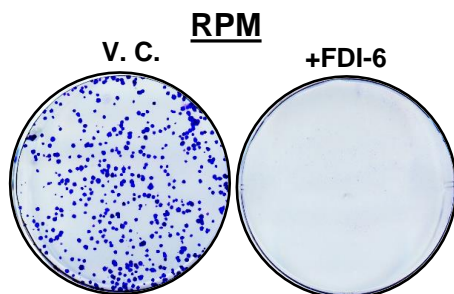

**E**

## RPM

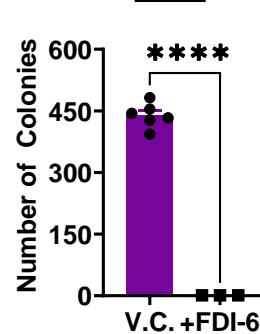

**Supplementary Figure S1:** Human and murine SCLC cells express a robust amount of FOXM1 and FOXM1 inhibition adversely affects cell viability and colony formation. **A)** Single cell RNA-sequencing data analysis revealed distinct populations of cell clusters between normal, SCLC and Lung adenocarcinoma. **B)** Differential gene expression analysis performed on the single cell data showed FOXM1 overexpression in SCLC cells. **C)** RPM tissue IHC showing robust expression of FOXM1 which is downregulated in FDI-6/FOXM1 inhibitor treatment. **D)** FOXM1 inhibition impairs colony formation of RPM SCLC cells. **E)** Measuring colony numbers from figure **D** showed significant downregulation in colony formation capabilities (n=3/6, student's t test performed for significance analysis, \*,  $p < 0.05$ , \*\*,  $p < 0.01$ , \*\*\*,  $p < 0.001$ , ns, non-significant).

# Supplementary Figure S2

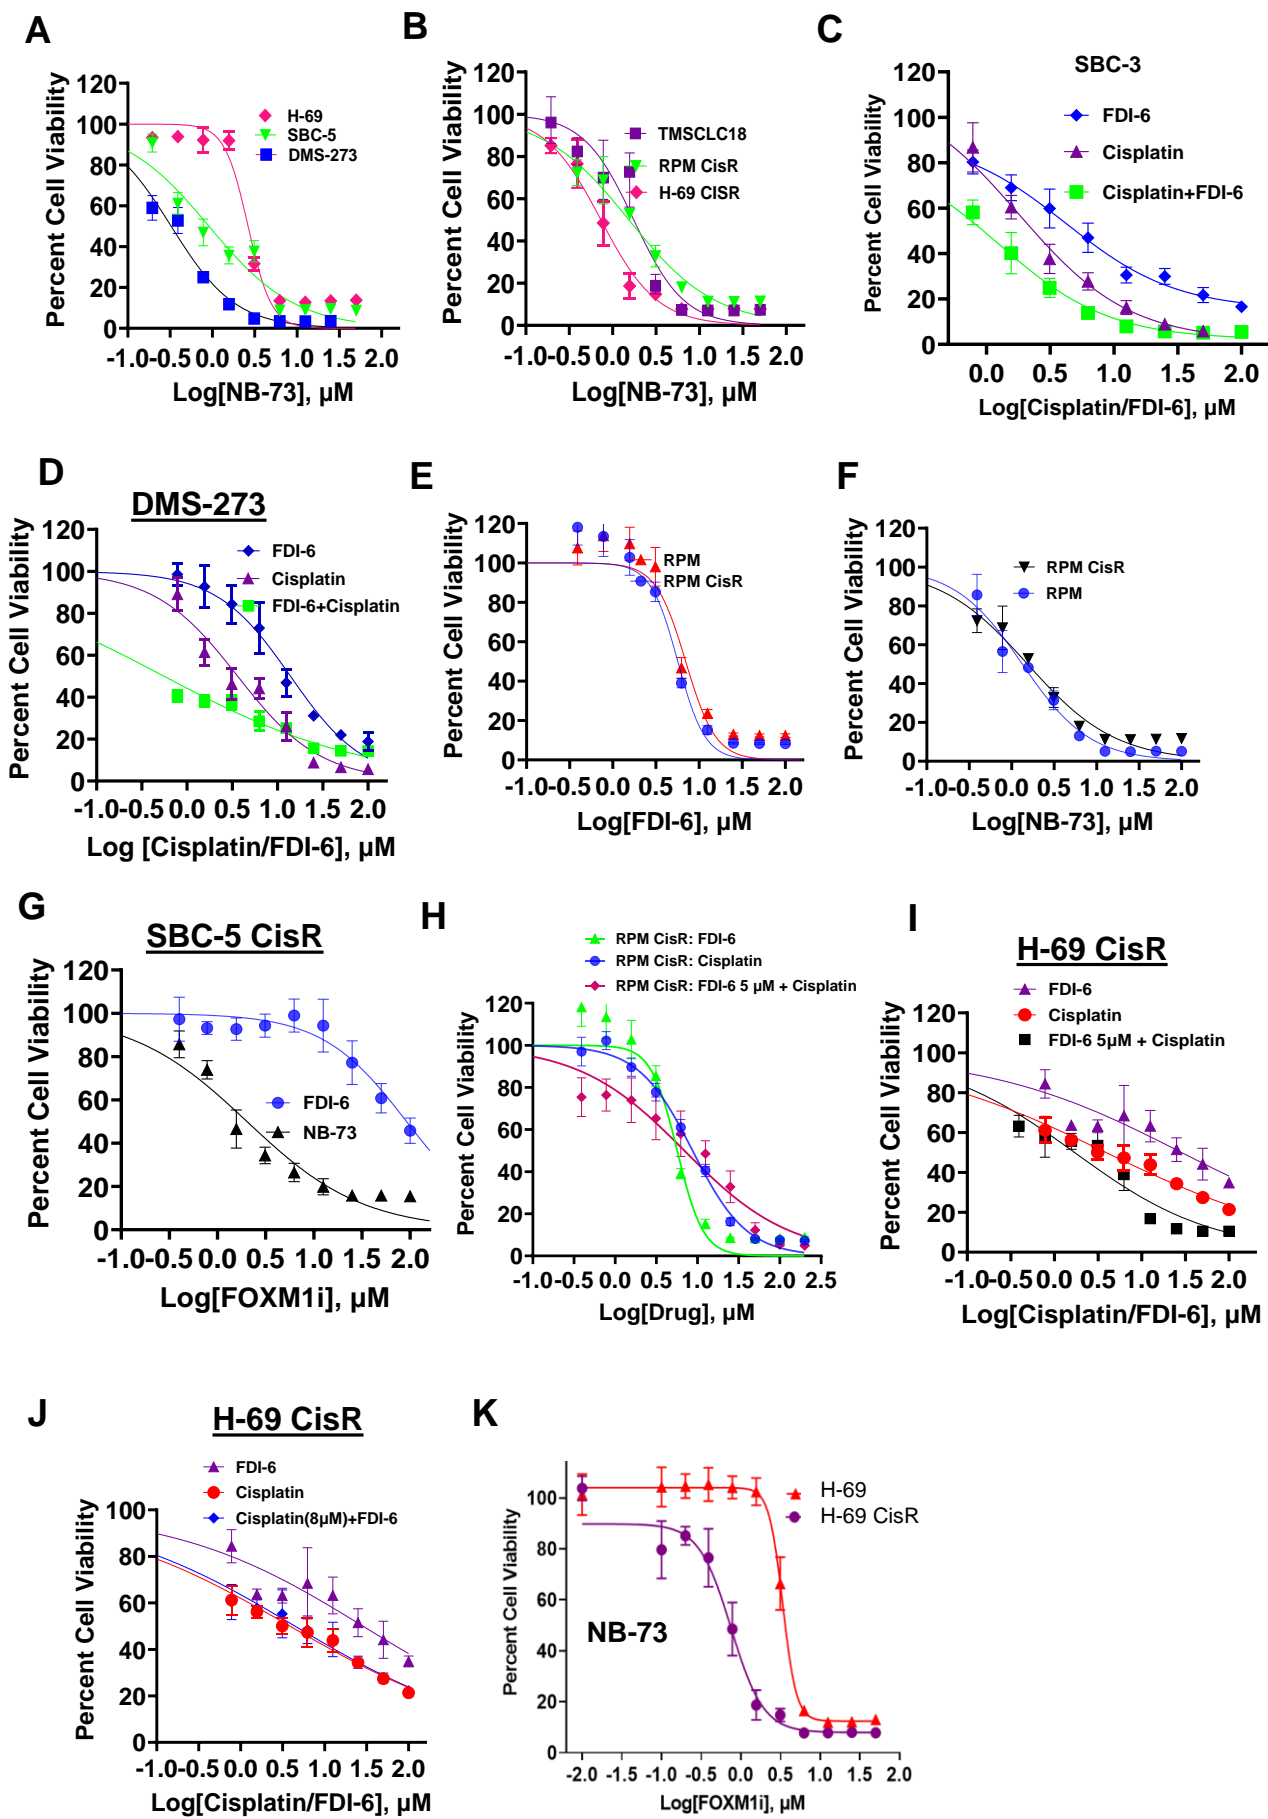

**Supplementary Figure S2:** FOXM1 inhibition reduces naïve and chemo-resistant SCLC cell viability and shows synergistic anticancer response with cisplatin. **A-B)** FOXM1 inhibitor NB-73 potently decreases viability of SCLC naïve and chemo-resistant SCLC cells. **C-D)** FOXM1 inhibition shows synergistic anticancer response with cisplatin. **E-F)** FOXM1 inhibitors effectively reduce the viability of naïve and chemo-resistant murine cell line models. **G)** SBC-5 CisR cells show reduction in cell viability after FOXM1 inhibition. **H)** RPM CisR cells show synergistic anticancer effects with cisplatin at low concentrations of cisplatin. **I)** FOXM1 inhibition sensitizes H-69 CisR cells towards cisplatin. **J)** High dose cisplatin treatment does not show sensitize chemo-resistant cells to FOXM1 inhibitor FDI-6. **K)** H-69 CisR cells showed higher susceptibility towards FOXM1 inhibition compared to its naïve counterpart H-69.

Supplementary Figure S3

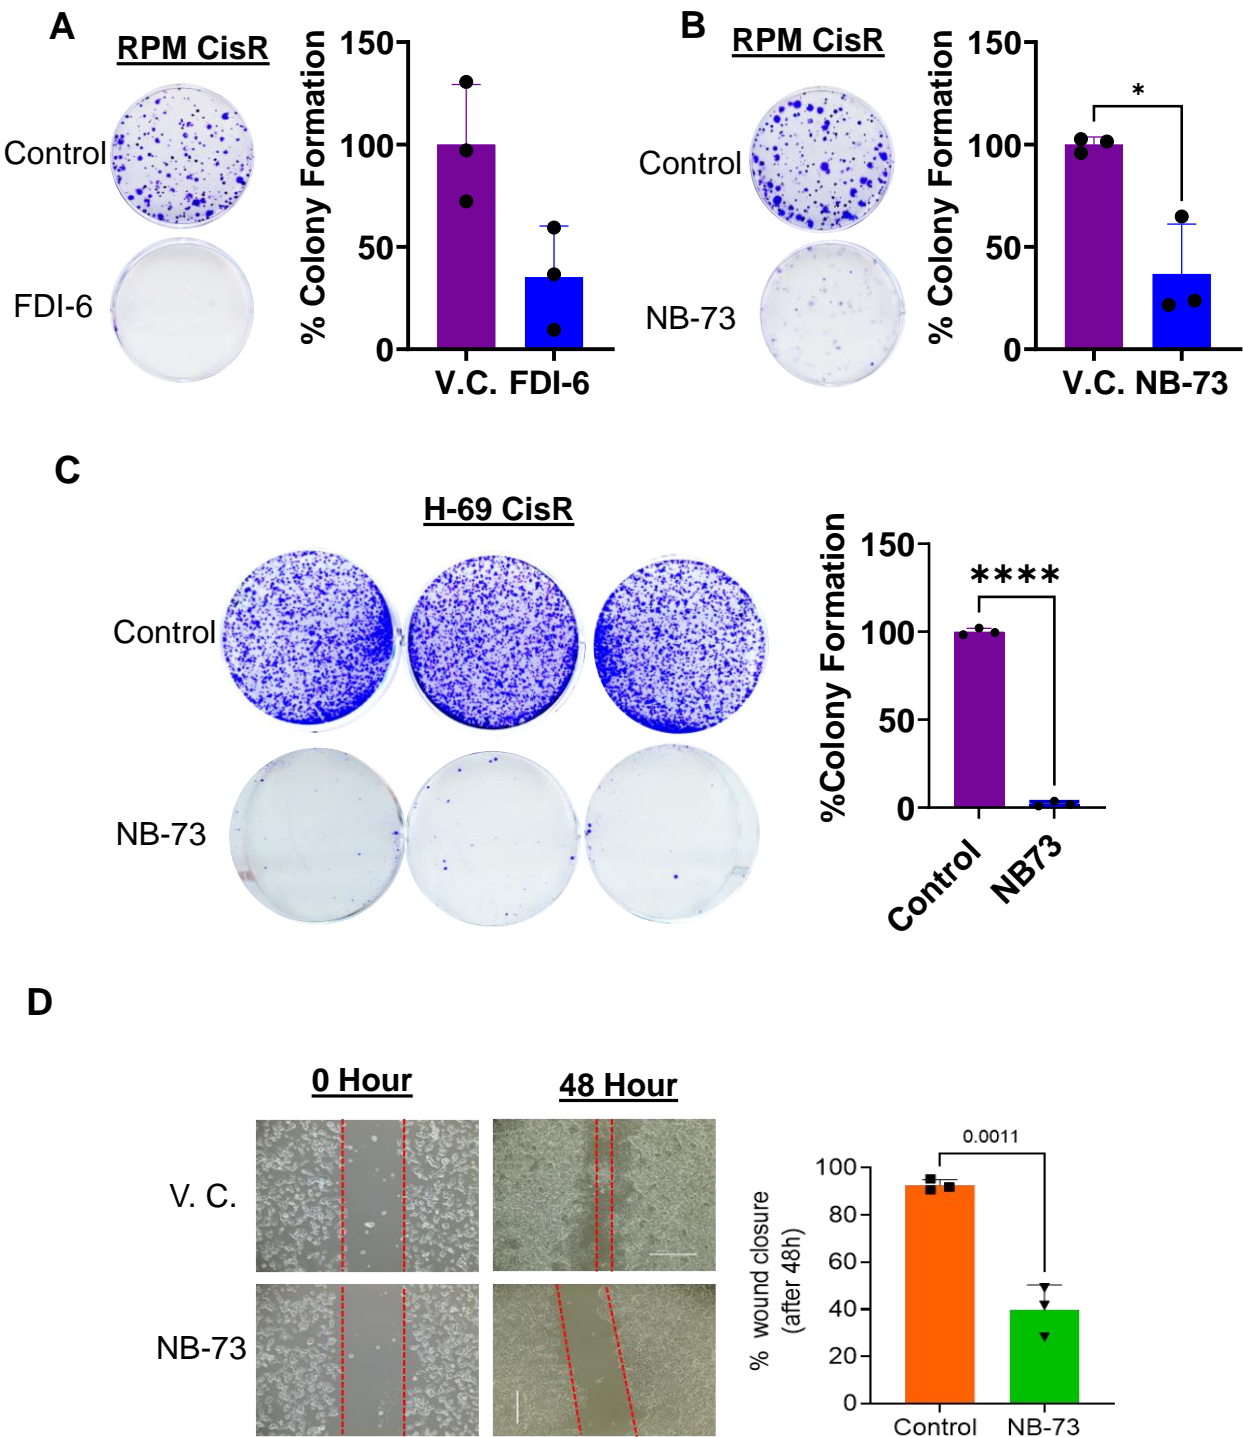

**Supplementary Figure S3:** FOXM1 inhibition reduces colony formation and wound healing of naïve and chemo-resistant cancer cells. **A-B)** FOXM1 inhibitors decrease colony formation of chemo-resistant RPM cells. **C)** FOXM1 inhibition significantly reduces colony formation of H-69 CisR cells. **D)** FOXM1 inhibitor delays wound healing in scratch assay.

# B

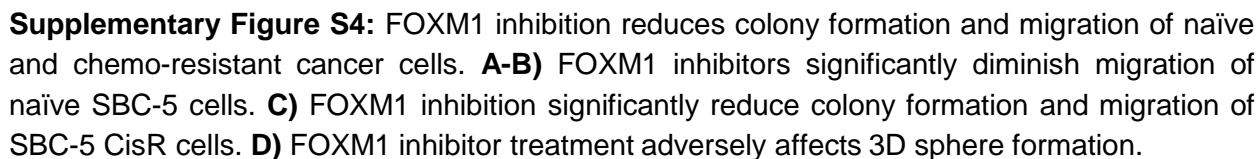



Supplementary S5

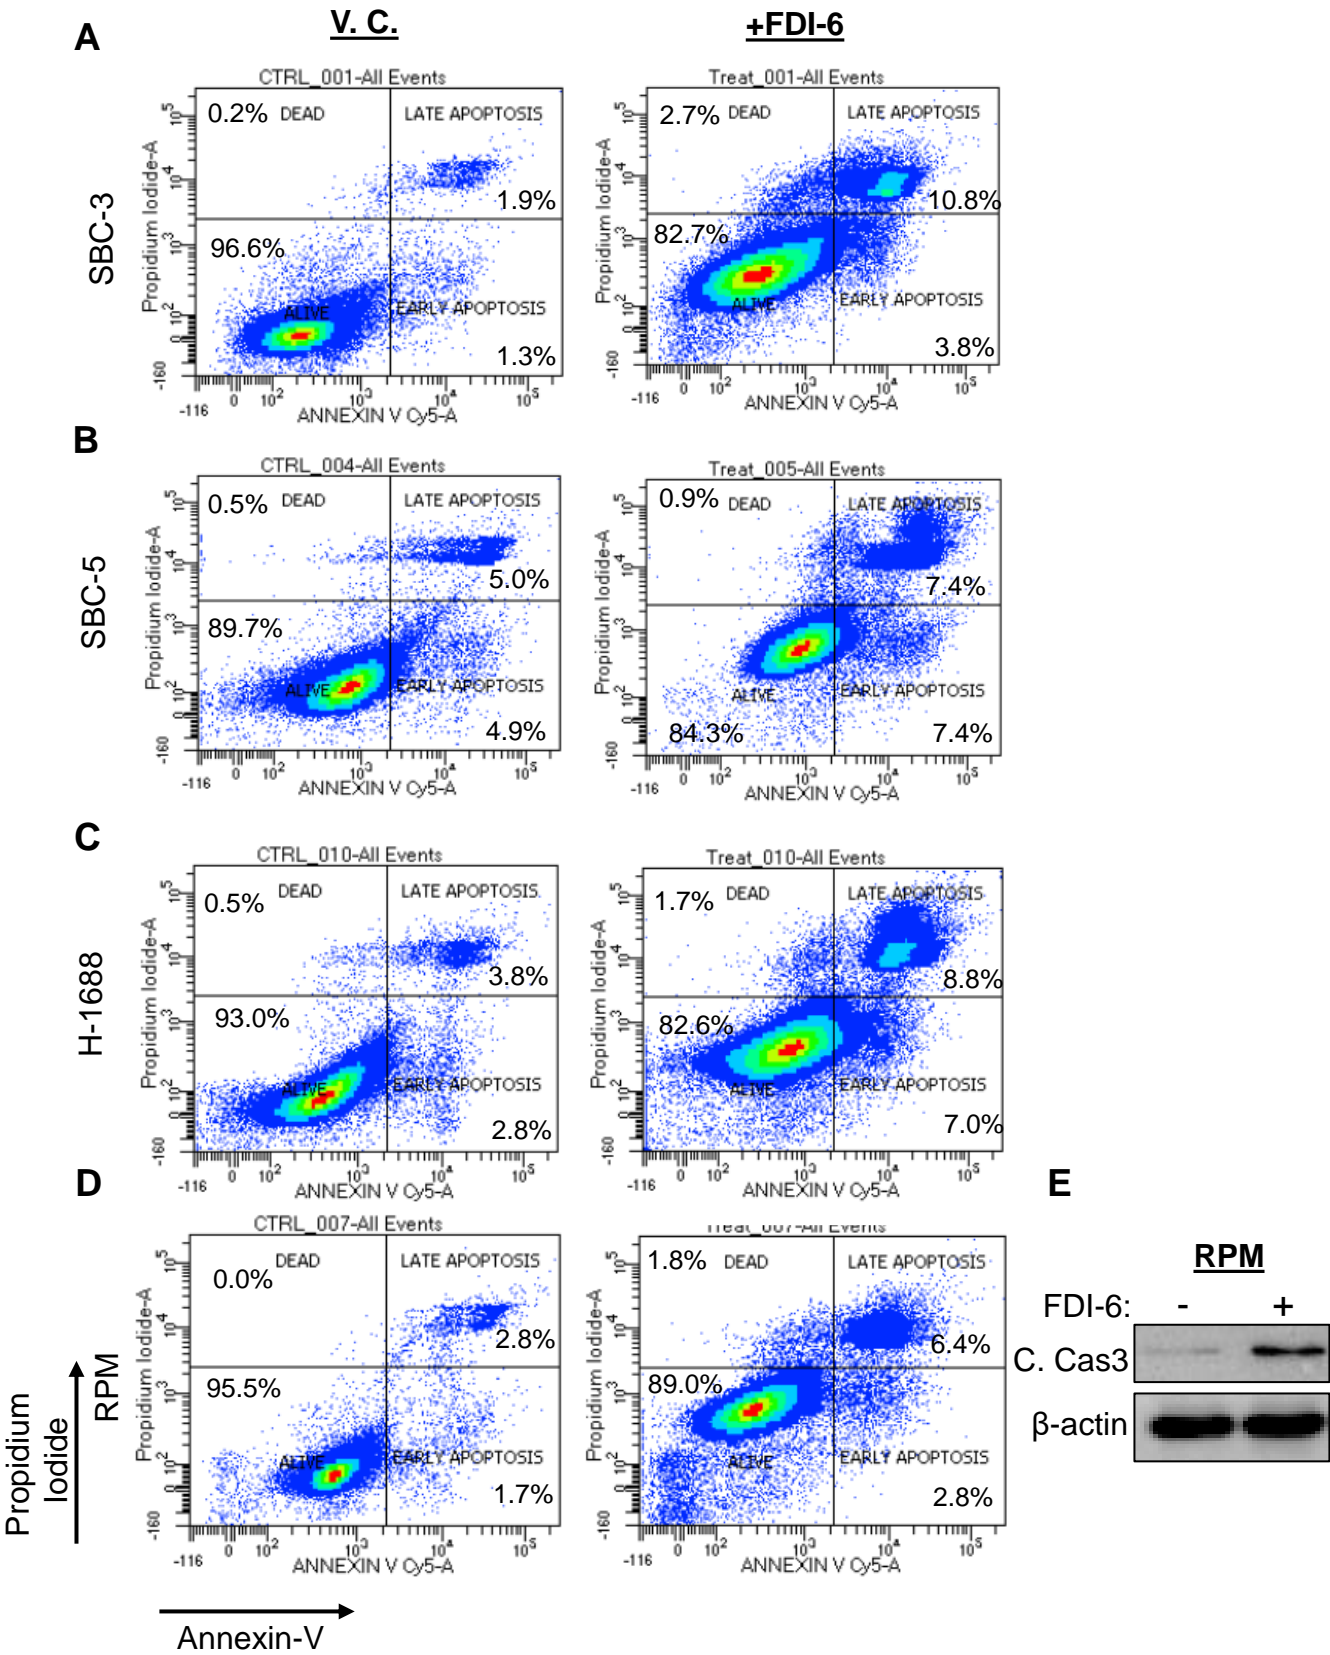

**Supplementary Figure S5:** FOXM1 inhibition using FDI-6 induced apoptosis in multiple human and murine (RPM) SCLC cell lines. **A-D)** FDI-6 Treatment resulted in the increase of apoptotic cell numbers compared to control cells in SBC-3, SBC-5, H-1688 and RPM cells. **E)** FDI-6 treatment induced the expression of apoptotic markers- cleaved caspase 3 (CC3) in RPM murine cell line model.



Supplementary S6

A

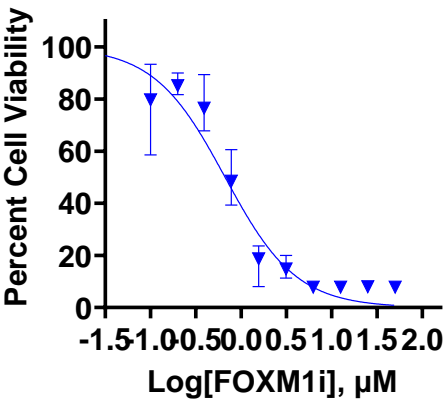

B

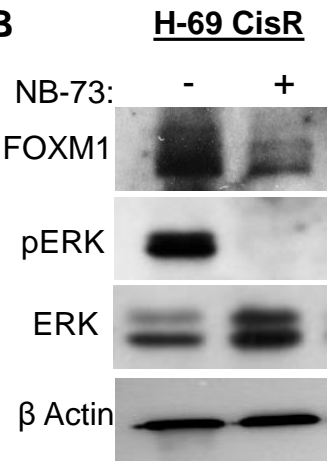

C

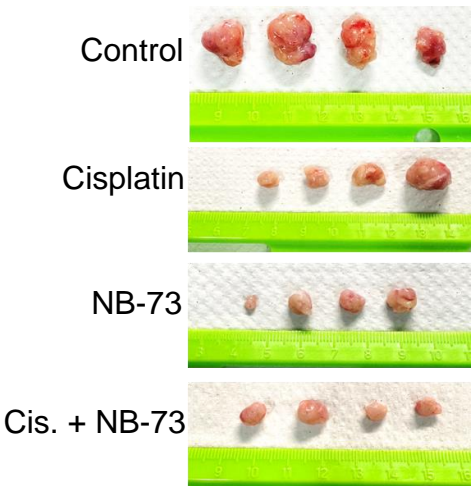

D

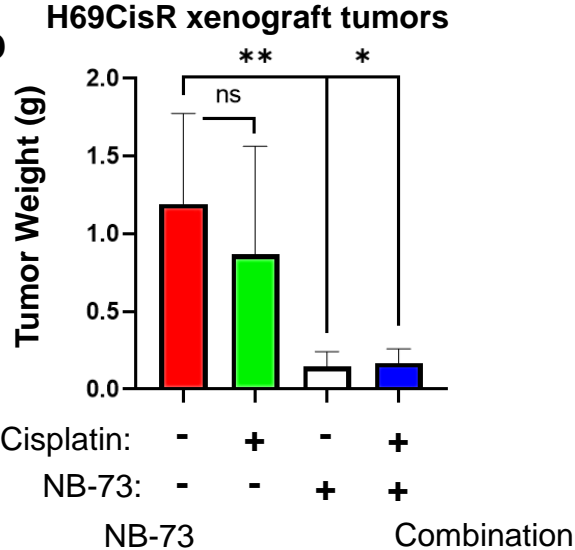

E

V. C. Cisplatin

Cleaved C3

Ki-67

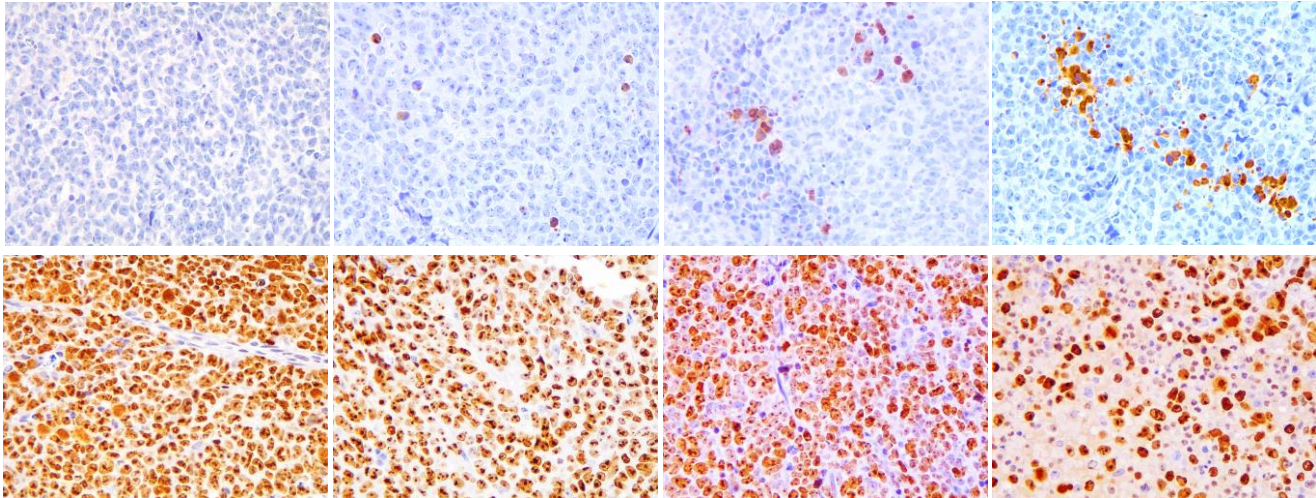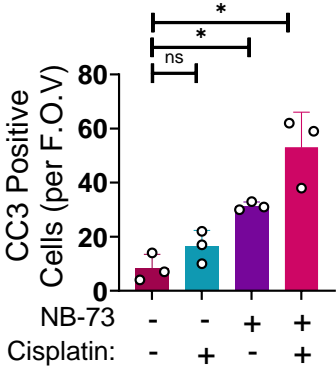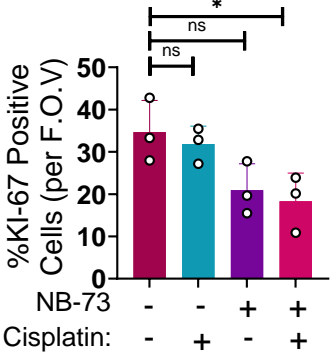

**Supplementary Figure S6:** FOXM1 inhibition treatment alone or inhibition with cisplatin resulted in the reduction of chemo-resistant SCLC cell viability and tumor progression in cisplatin resistant xenograft mouse model of SCLC. **A)** FOXM1 inhibitor NB-73 reduces viability of chemo-resistant H69 CisR SCLC cell line model. **B)** FOXM1i NB-73 treatment reduced FOXM1 protein and activated ERK (pERK) levels in H-69 CisR cells. **C)** Cisplatin, NB-73 or a combination treatment led to a reduction in SCLC tumor growth in H-69 CisR subcutaneous xenograft mouse model study. **D)** Quantification of xenograft tumor weight which were isolated from different treatment groups (n=4, student's t test performed for significance analysis, \*,  $p < 0.05$ , \*\*,  $p < 0.01$ , \*\*\*,  $p < 0.001$ , ns, non-significant). **E)** IHC staining performed on subcutaneous xenograft tumor tissue sections.

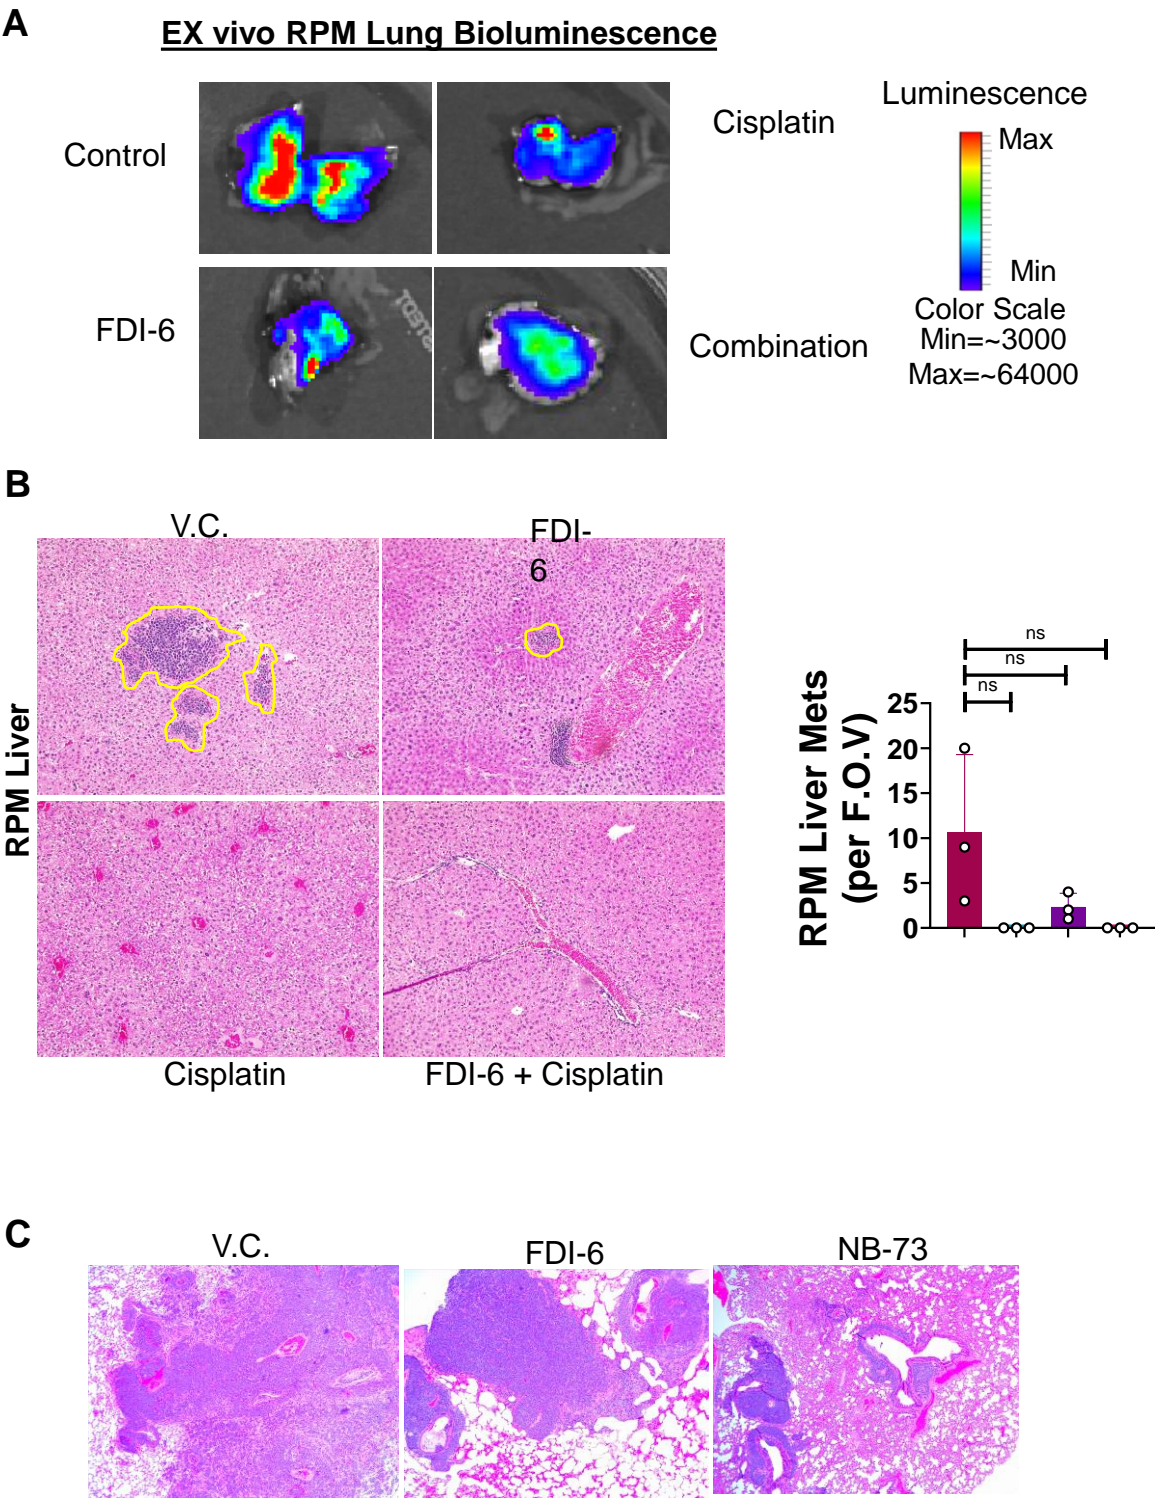

**Supplementary Figure S7:** Cisplatin and/or FDI-6 treatment resulted in the reduction of lung tumor bioluminescence and hepatic metastasis in RPM mouse model. **A)** Ex vivo bioluminescence imaging of RPM lung showed a reduction in bioluminescence intensity in RPM Mice lung in different treatment groups. **B)** RPM mouse model showed substantial reduction in the number of micro-metastatic nodules as well as the size of these nodules after cisplatin and/or FDI-6 treatment. **C)** In a pilot study carried out on RPM mouse model showed effectiveness of NB-73 on spontaneous SCLC tumors.



Supplementary S8

A

CD31+ DAPI

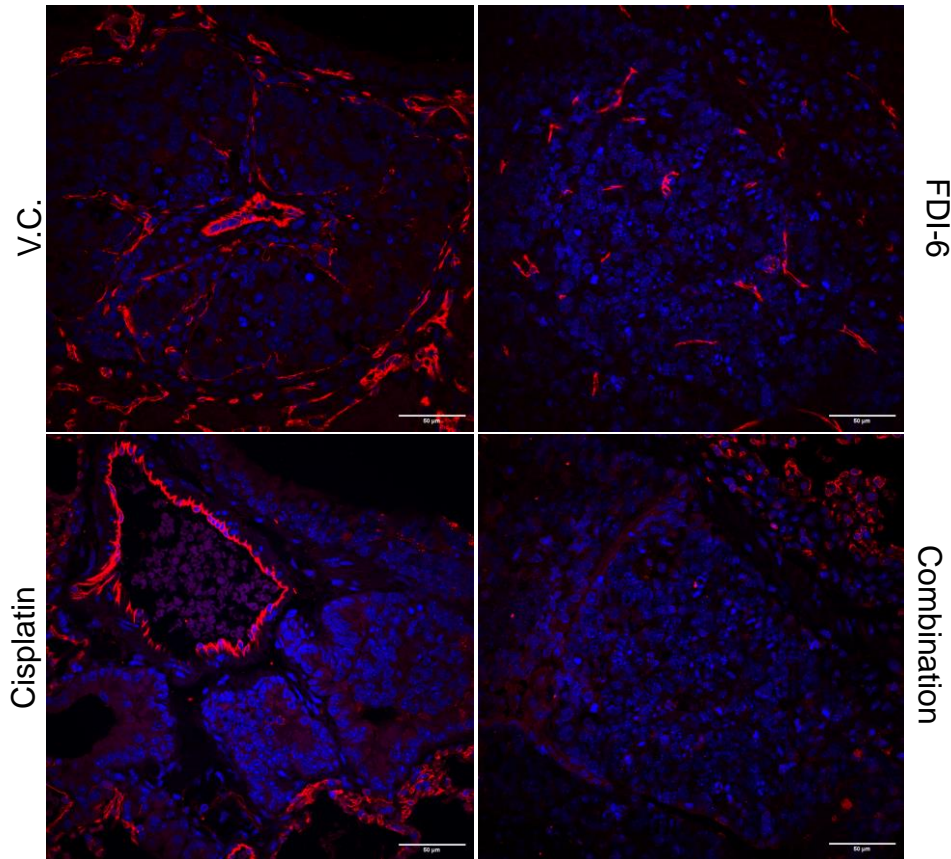

B

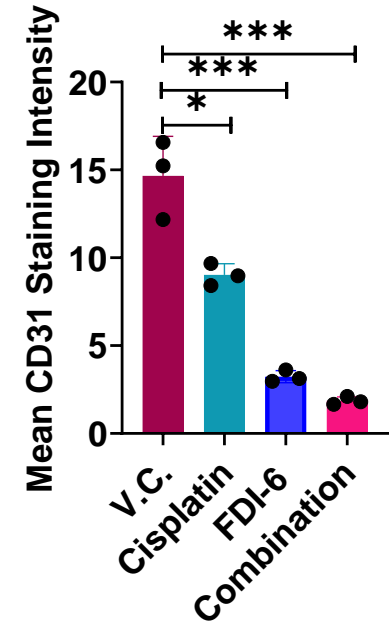

C

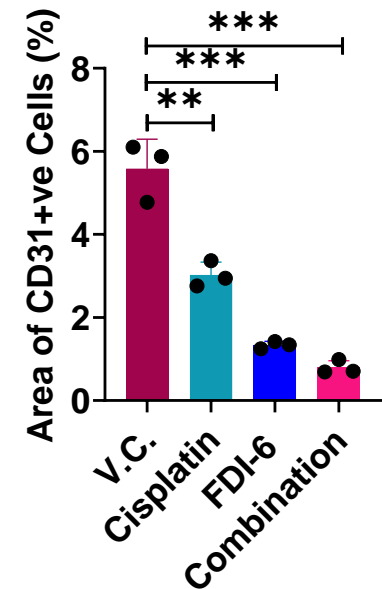

**Supplementary Figure S8:** Cisplatin and/or FDI-6 treatment resulted in the reduction of angiogenesis in RPM Lung tumors. **A)** Cisplatin, FDI-6 or a combination treatment reduces staining for CD31 (marker of angiogenesis) in RPM lung tumors. **B-C)** Quantification of CD31 staining intensity and area (n=3, student's t test performed for significance analysis, \*, p<0.05, \*\*, p < 0.01, \*\*\*, p < 0.001, ns, non-significant).

Supplementary S9-S10

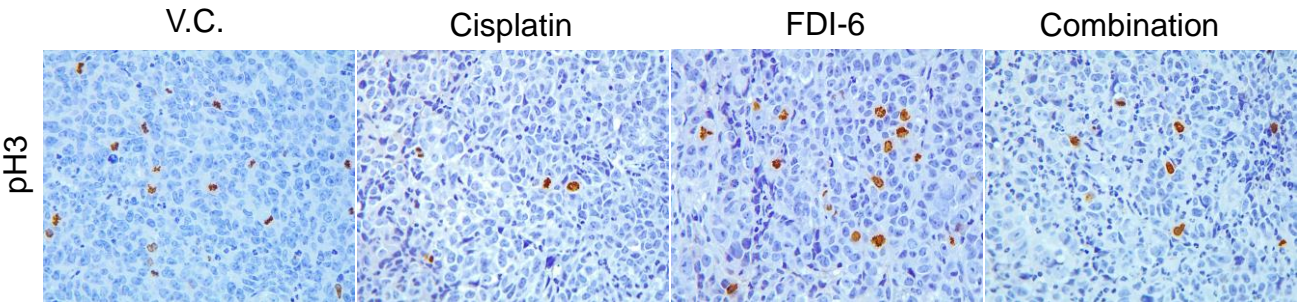

**Supplementary Fig. S9:** pH3 IHC experiment performed on SBC3 xenograft tumor sections showed a reduction in pH3 staining. IHC staining carried out on xenograft tumors showed difference in pH3 staining in different treatment groups.

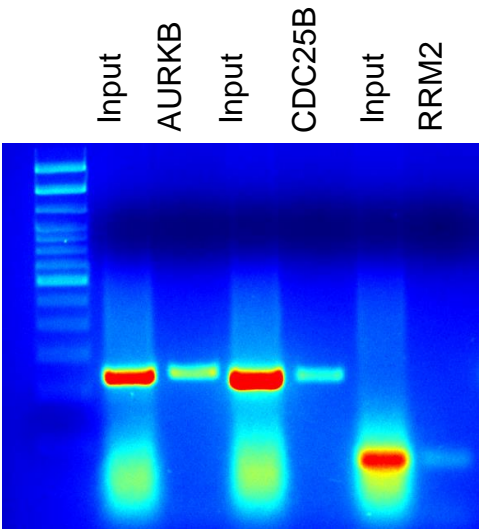

**Supplementary Figure S10:** ChIP-PCR experiment performed on FOXM1 ChIP samples shows multiple genes that are under the regulation of FOXM1. ChIP-PCR experiment using SBC3–FOXM1 ChIP lysate revealed that FOXM1 is transactivating Aurora Kinase B, CDC25B and RRM2.

# Supplementary S11-S12

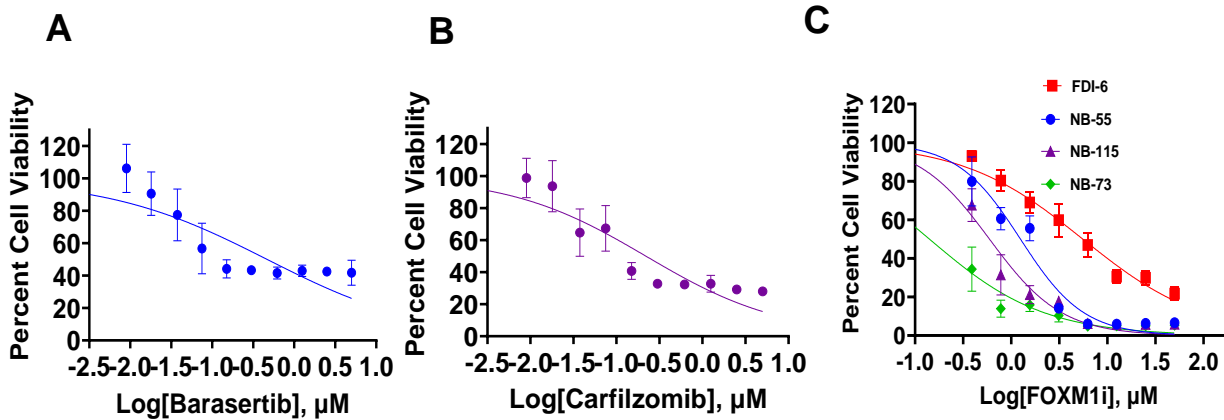

**Supplementary Figure S11:** Aurora Kinase B inhibitor Barasertib and non-specific FOXM1 inhibitor Carfilzomib reduced the viability of SBC-3 SCLC cells. **A)** Barasertib potently decreased the viability of SBC-3 cells with an IC<sub>50</sub> value of 0.53  $\mu\text{M}$ . **B)** Non-specific FOXM1 inhibitor carfilzomib is capable of adversely affecting viability of SCLC cells; SBC-3 cell viability goes down substantially after carfilzomib treatment (IC<sub>50</sub> value: 230  $\pm$  70 nM) **C)** Effectiveness of FOXM1 inhibitors on SBC-3 cell viability.

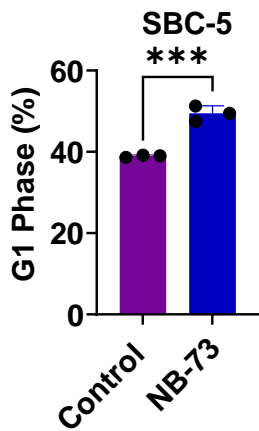

**Supplementary Figure S12:** FOXM1 inhibition by NB-73 leads to cell cycle arrest in SBC-5 cells. NB-73 treatment is inducing cell cycle arrest in SBC-5 cell line model in G1 phase of cell cycle.

Supplementary S13

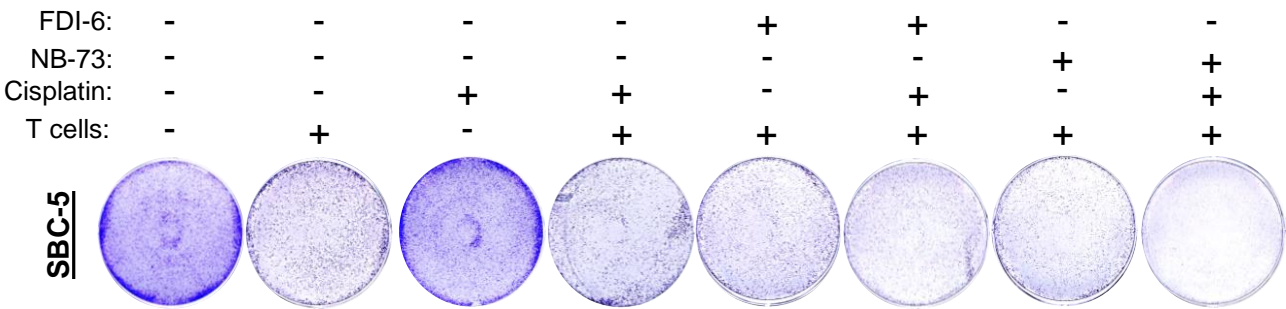

**Supplementary Figure S13:** Representative image of T cell mediated killing of SBC-5 cells after using different treatment conditions.FOXM1 inhibition alone or in combination with cisplatin enhances T cell mediated of cancer cells.



Supplementary S14

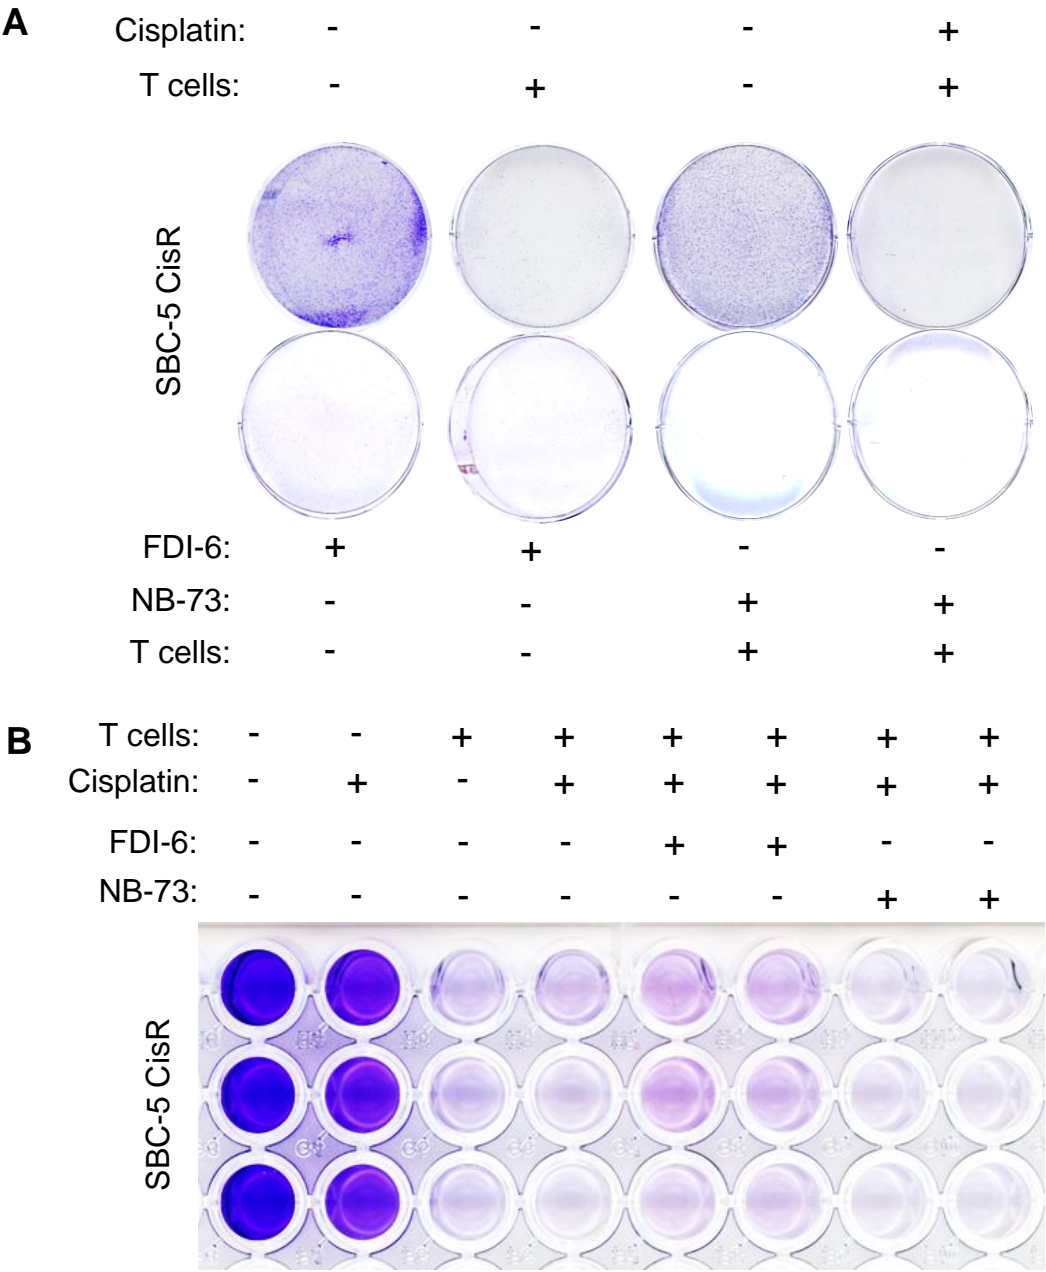

**Supplementary Figure S14:** Graphical representation of T cell mediated killing of chemo-resistant SCLC cells. **A)** FOXM1 inhibitors enhance T cell mediated killing of chemo-resistant SBC-5 CisR cells. **B)** Comparison of crystal violet staining in different treatment condition after dissolution.

Supplementary S15

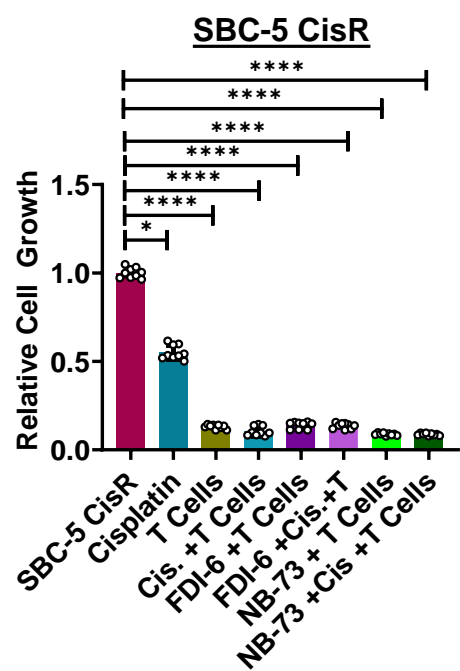

**Supplementary Figure S15:** Relative growth analysis of T cell killing experiment showed substantial reduction in cancer cell population in different treatment conditions. FOXM1 inhibitors enhance T cell mediated killing of chemo-resistant SBC-5 CisR cells.

Supplementary S16

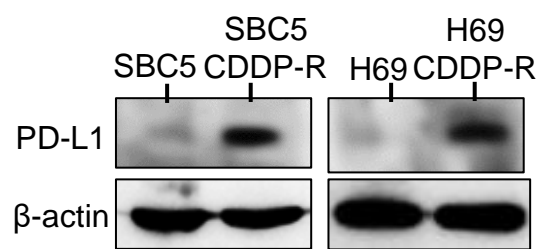

**Supplementary Figure S16:** PD-L1 expression increases with FOXM1 expression.  
B) PD-L1 expression increases in chemo-resistant SCLC cell lines SBC-5 CisR and H-69 CisR.

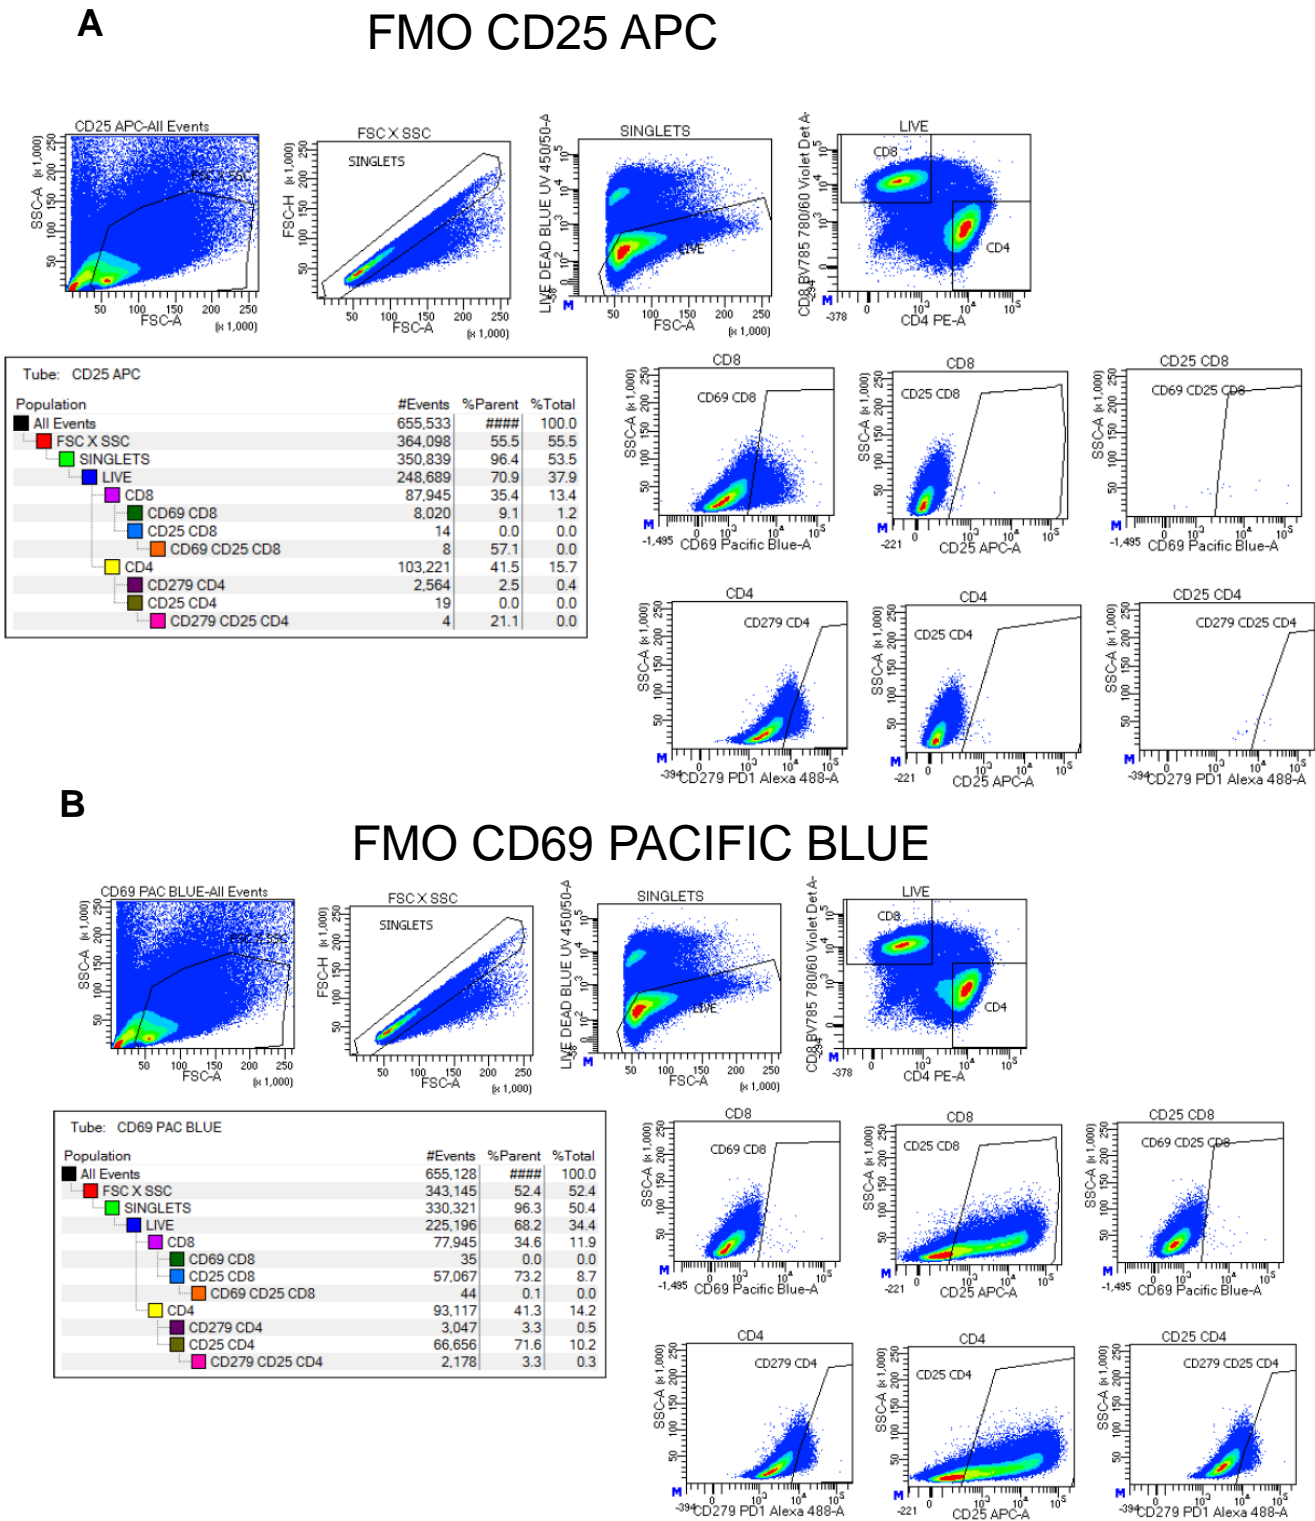

**Supplementary Figure S17:** Representative images of FMOs and gating strategy for T cells. A) FMO and gating strategy for CD25-APC. B) FMO and gating strategy of CD69 Pacific Blue.

FMO CD8 BV 785

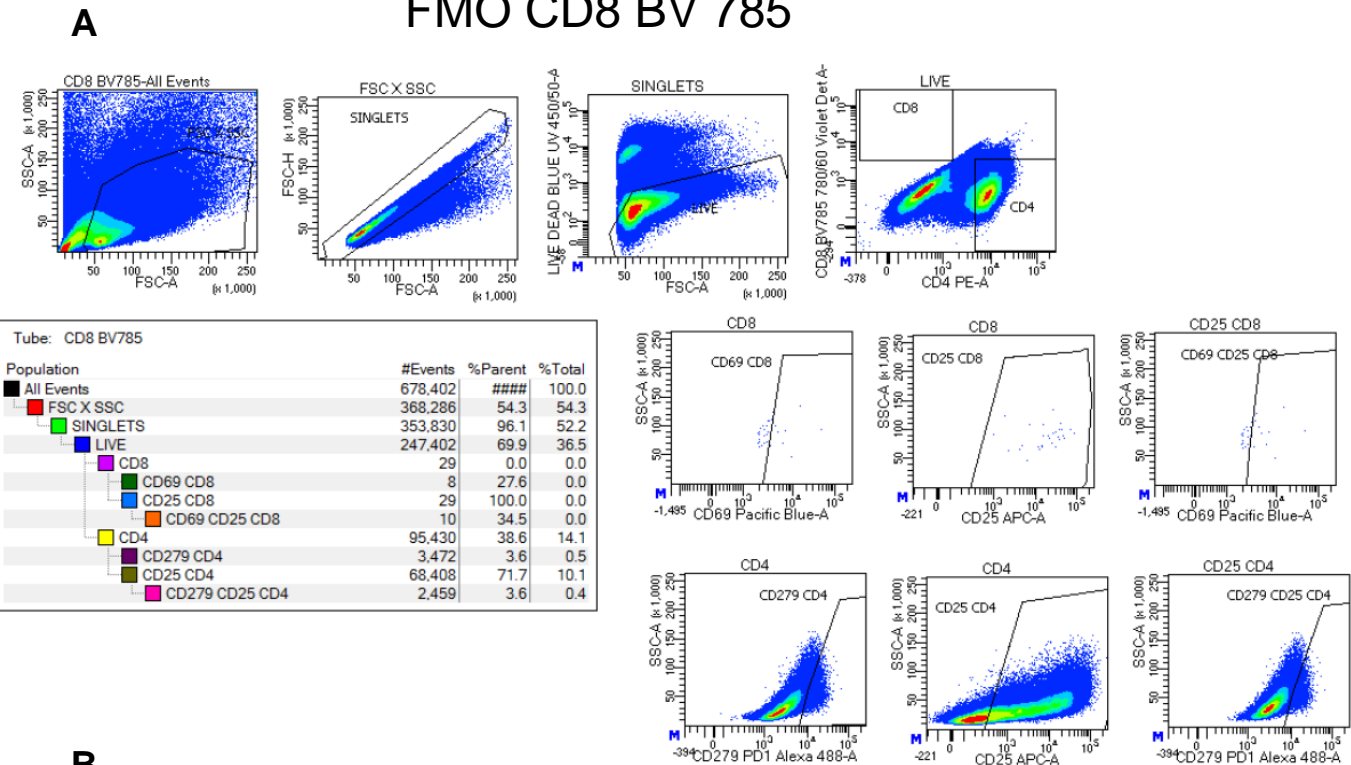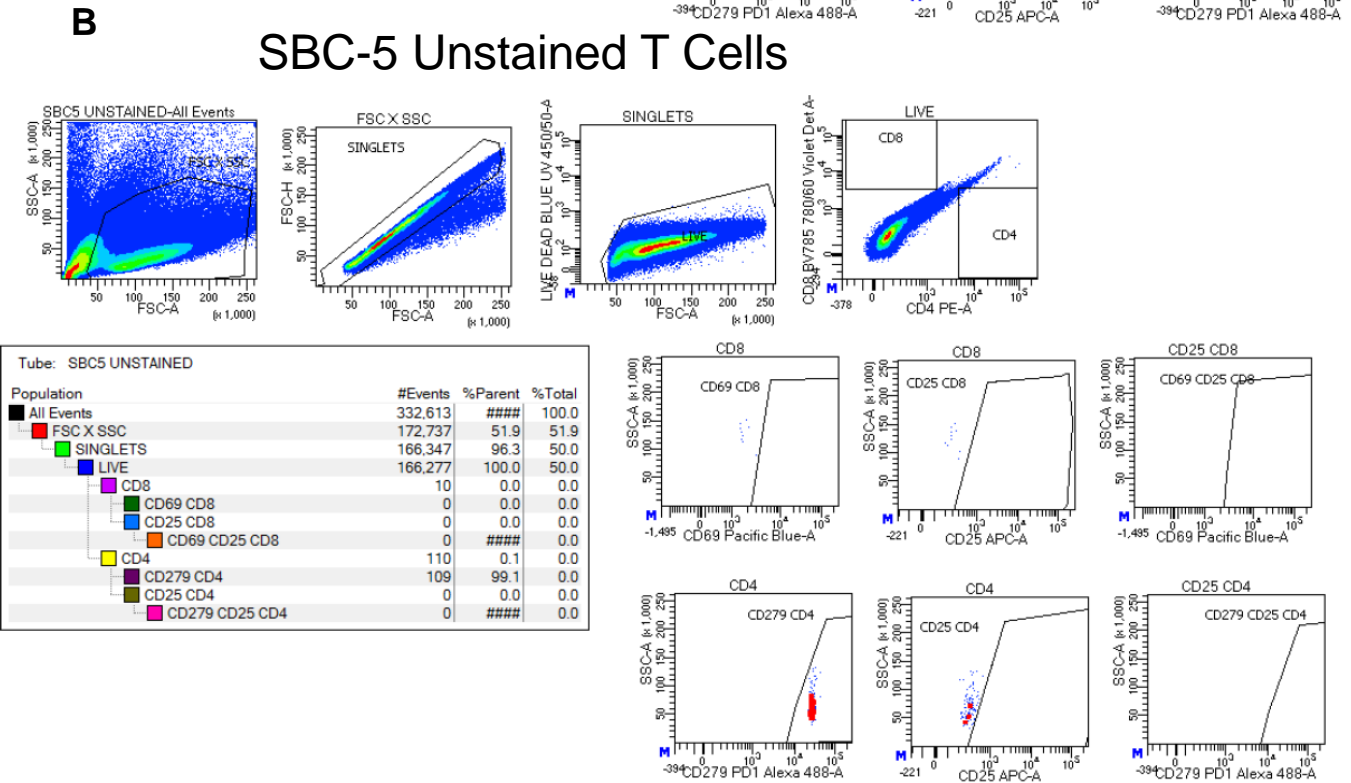

**Supplementary Figure S18:** Representative images of FMOs and gating strategy for unstained and stained T cells. **A)** FMO for CD8 brilliant violet shows no positive CD8 positive T cells. **B)** FMO and gating strategy FOR unstained T cells culture with SBC-5 cells.

SBC-5 CisR T cells Unstained

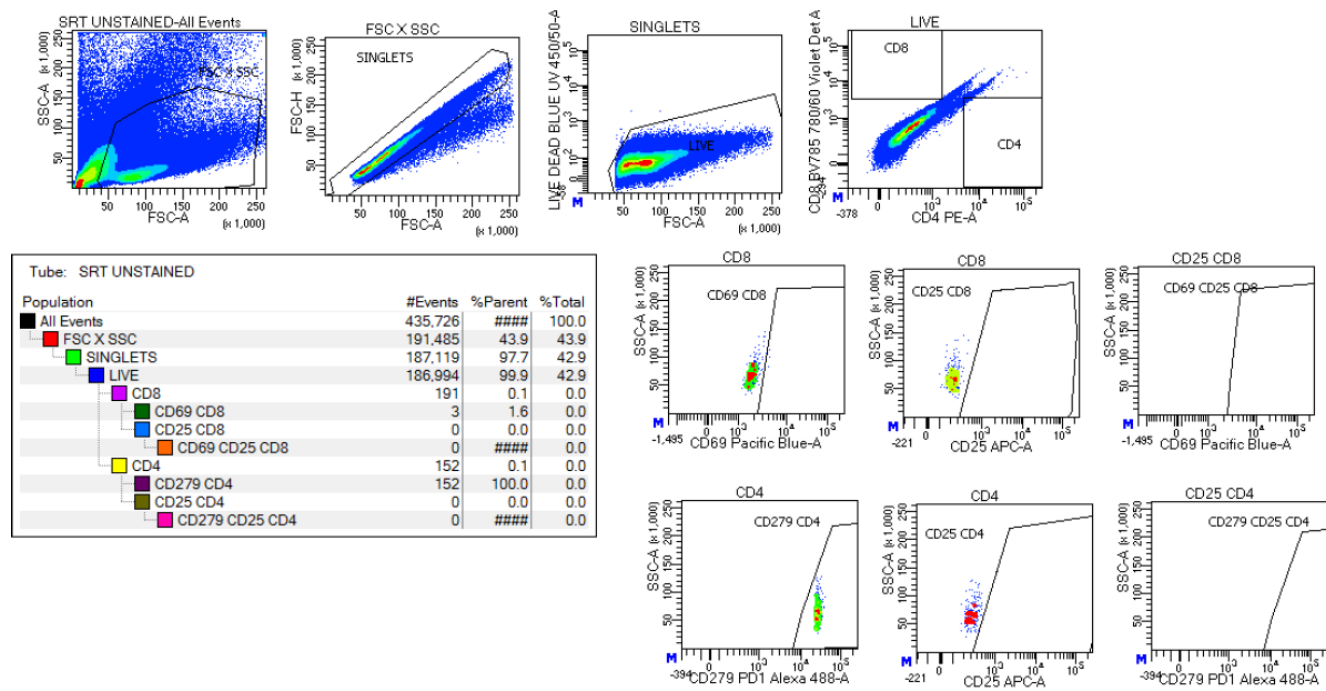

**Supplementary Figure S19:** Representative images of unstained T cells with gating strategy. Unstained T cells co-cultured with SBC-5 CisR cells with gating strategy.



Supplementary S20

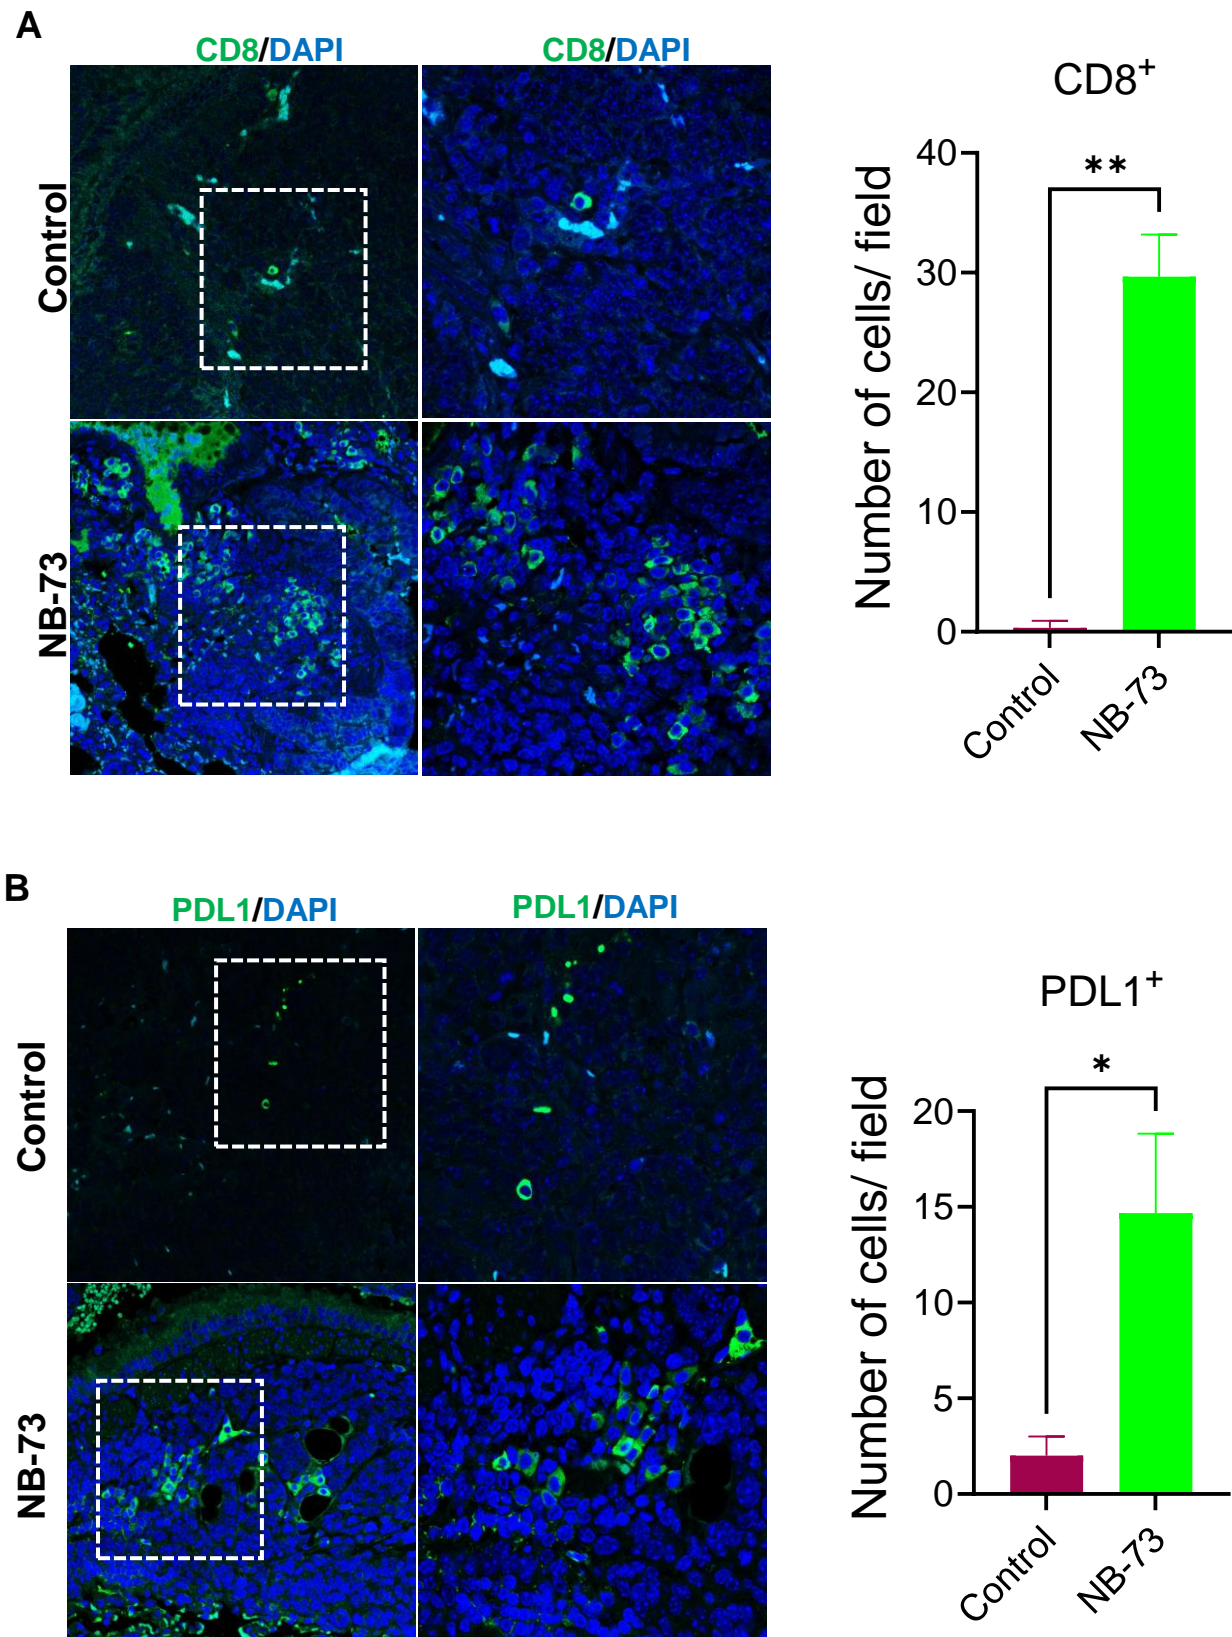

**Supplementary Figure S20:** Immunofluorescence staining for CD8+ cytotoxic T cells and PD-L1 expression on RPM tumor microenvironment. **A)** FOXM1 inhibitor NB-73 treatment showed an enhanced level of CD8+ T cell infiltration in the spontaneous RPM tumors. **B)** An increase in PD-L1 expression was observed in NB-73 treated RPM cells.



Supplementary S21

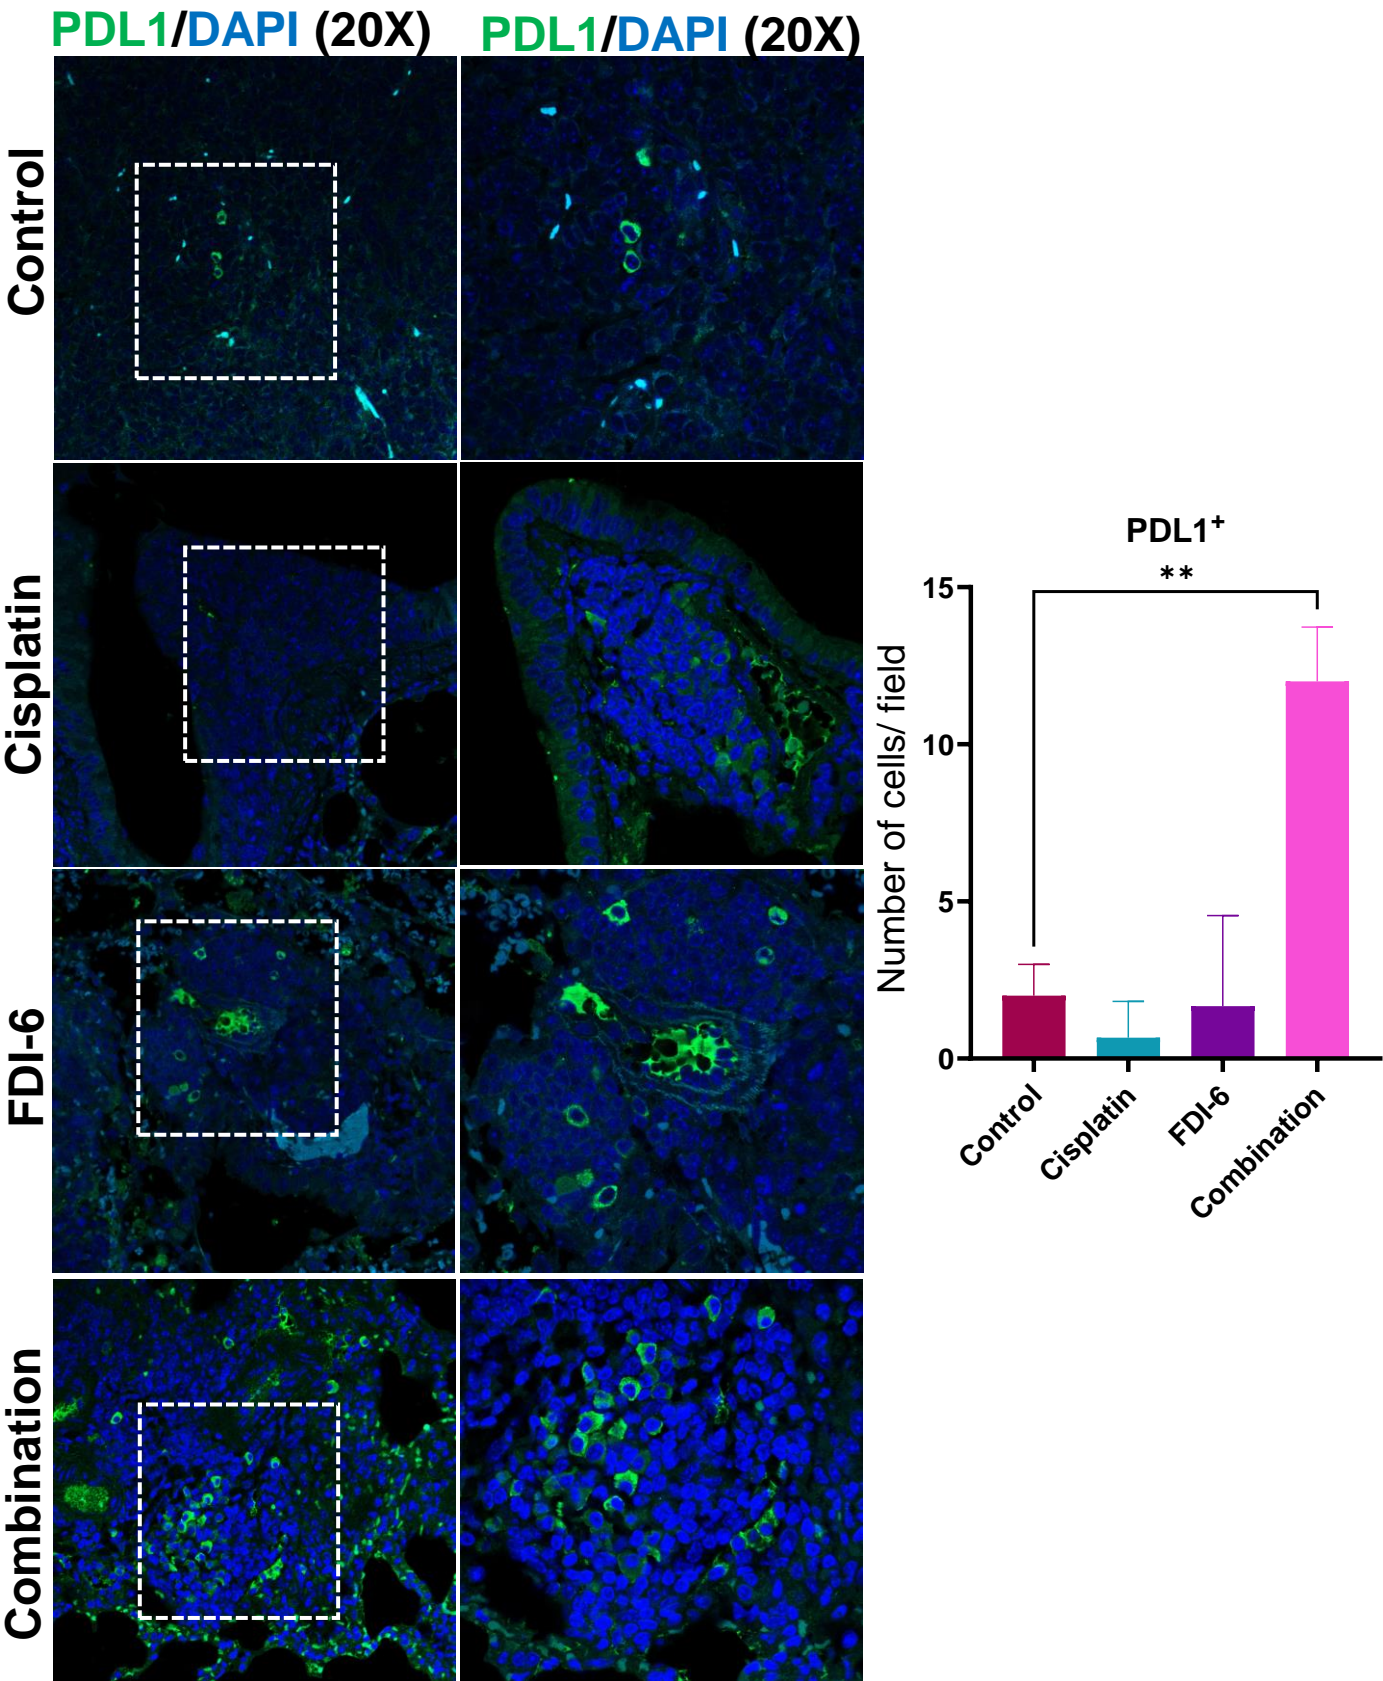

**Supplementary Figure S21:** Immunofluorescence staining for PD-L1 expression on RPM spontaneous tumor cells. An increase in PD-L1 expression was observed in FOXMi (alone or in combination with cisplatin) treated RPM tissues.
