# Supplementary material for: FOXM1 targeting alters AURKB activity and reshapes antitumor immunity to curb the progression of small cell lung cancer
Source: Research Square preprint supplement (doi:10.21203/rs.3.rs-6960266/v1), 2025-07-01
Supplement: Supplementary file 1 [file a3611cc53bb00cd5a10f3193.docx]

**FOXM1 targeting alters AURKB activity and reshapes antitumor immunity to curb the progression of small cell lung cancer**

Md Arafat Khan1, Parvez Khan1*, Mahek Fatima1, Asad Ur Rehman1, Laiba Anwar1, Zahraa Wajih Alsafwani1, Aatiya Ahmad1, Mohammad Ali Abbas Zaidi1, Jesse L. Cox2, Areem Zahid1, Sameer Mohiuddin1, Sung Hoon Kim3, Juan A Santamaria-Barria4, Imayavaramban Lakshmanan1, Benita S Katzenellenbogen5, John A. Katzenellenbogen3, Apar K Ganti6,7, Surinder K Batra1,7,8, Mohd Wasim Nasser1,7*

*1Department of Biochemistry and Molecular Biology, University of Nebraska Medical Center, Omaha, Nebraska, USA.*

*2Department of Pathology, Microbiology and Immunology, University of Nebraska Medical Center, Omaha, Nebraska, USA.*

*3Department of Chemistry and Cancer Center, University of Illinois at Urbana-Champaign, Urbana, IL 61801, USA*

*4Department of Surgery, University of Nebraska Medical Center, Omaha, Nebraska, USA.*

*5Department of Molecular and Integrative Physiology and Cancer Center, University of Illinois at Urbana-Champaign, Urbana, IL 61801, USA*

*6Division of Oncology-Hematology, Department of Internal Medicine, VA-Nebraska Western Iowa Health Care System, and Division of Oncology-Hematology, Department of Internal Medicine, University of Nebraska Medical Center, Omaha, NE-68198, USA,*

*7Fred and Pamela Buffett Cancer Center, University of Nebraska Medical Center, Omaha, NE-68198, USA.*

*8Eppley Institute for Research in Cancer and Allied Diseases, University of Nebraska Medical Center, Omaha, NE-68198, USA.*

***To whom all correspondence should be addressed:**

Parvez Khan, Ph.D. or

Mohd Wasim Nasser, Ph.D.

Department of Biochemistry and Molecular Biology

University of Nebraska Medical Center,

Omaha, NE-68198, USA.

E-mails: parvez.khan@unmc.edu or wasim.nasser@unmc.edu

Phone: +1- 402-5592027

**Material and Methods**

**Materials**

**Cell lines collection and maintenance, and FOXM1 inhibitor compounds utilized**

We used multiple SCLC cell lines including- SBC3, SBC5, DMS-273, H82, H1688, Colo668, RPM. SBC3 is a human SCLC cell line, and this cell line was a gift from Dr. Takashi Kijima who works at Osaka University, Japan. We have used another Japanese SCLC cell line model- SBC5. SBC-5 was purchased from JCRB (Japanese Collection of Research Bioresources) cell bank, Osaka, Japan. We have purchased multiple American SCLC cell line models of human origin including- DMS-273, NCI-H69, NCI-H82, Colo-668, NCI-H526 and H-1688 from American Type Culture Collection (ATCC) which is located at Rockville, MD, USA. The SCLC cell lines were cultured and maintained in a CO2 incubator at a specific temperature of 37°C. Modified RPMI-1640 (Cytiva, catalogue number- SH30027.01) cell culture media was used for the culture of human SCLC cell lines. The following components were routinely added to RPMI-1640 for the culture of human SCLC cell lines- 1) 10% fetal bovine serum from Sigma-Aldrich (catalogue number- 12303c), 2) sodium bicarbonate (1500mg/L) from Cytiva (catalogue number- SH30033.01), 3) 1% sodium pyruvate from Cytiva (catalogue number- SH30239.01), 4) 100X penicillin- streptomycin antibiotic cocktail from Hyclone (Hyclone SV30010), 5) 1% L-glutamine (Hyclone SV 30010). The cells were washed with PBS (Cytiva, Cat. number- SH30028.02) before and after trypsinization. RPM is a mice cell line generated in our lab and DMEM (Cytiva, cat. number- SH30243.01) was used to culture them. Moreover, all the cell lines were routinely tested for mycoplasma contamination and STR analysis was performed.

The FOXM1 inhibitor FDI-6 was purchased from Selleckchem (catalogue number- S9689). The compounds NB-73 and NB-115 were synthesized as described previously by Dr. Benita’s group. The total RNA isolation kit mirVana™ (Cat. No. AM1560) was bought from Applied Biosystems.

**Cell Viability Assays**

All the SCLC cell lines were cultured to an optimum concentration so that control cells could sustain their growth after treatment initiation. 1500-3000 cells were seeded in a 96 well plate and grown in the incubator at 37 °C with 5% CO2. The next day, cells were treated with different drug concentrations. Control cells have a tendency to grow rapidly and tend to die due to contact inhibition. To mitigate contact inhibition, 5% serum containing media was used to prepare drug treatments. In order to determine cell viability, 10μl MTT dye was added to each well of 96 well plates with a concentration of 5mg/ml. After three to four hours of incubation, the media was removed, and formazan formed from cellular metabolism was dissolved in 100 μls of DMSO. Subsequently, absorption values of different wells were measured using a UV-visible spectroscopy at 570 nm.

**Colony Formation Assay**

SCLC cells (adherent) were cultured in RPMI media supplemented with L-glutamine, sodium bicarbonate, sodium pyruvate and 10% FBS. Once the cells reached a 70% confluency, they were trypsinized and seeded in 6 well plates at a density of 750-1000 cells per well. The cancer cells were allowed to adhere for 24 hours, and different concentrations of treatments were added including- FOXM1 inhibitor FDI-6, NB-73 and doxycycline (for conditional knockdown/KD cells). The plated cells were allowed to form colonies. Once the colonies formed (approximately 6-9 days), they were fixed with methanol followed by staining with 0.5% crystal violet solution (dissolved in 80% water and 20% methanol). The plates were then carefully rinsed with water without dislodging the colonies and later air-dried. Once the plates were dry, they were cleaned and subsequently scanned. The subsequent images were then analyzed using ImageJ to count the colonies and the colony counts were then plotted using GraphPad Prism with Student’s t-test data (analyzed with GraphPad Prism).

**Trans-well Migration Assay**

Adherent SCLC cells were cultured in RPMI Media (composition previously mentioned) and treated with FOXM1 inhibitors when they reached 50% confluency. After 48 hours of treatment, the cells were starved overnight in incomplete RPMI media (with the different drug treatments) which lacked FBS. The cells were then trypsinized and 300 thousand cells were seeded in a six well trans-well plate in incomplete media. The bottom of the trans-well plates had 20% FBS containing media and the cancer cells were attracted to the high FBS media. The cells were allowed to migrate overnight. Afterwards, of the trans-well membranes were cleaned gently and fixed using methanol. The fixed cells were further stained with 0.5% crystal violet solution (previously mentioned) and the wells were rinsed with water to remove excess dye. The wells were imaged using Leica ICC50 W microscope and those images were later analyzed using Image J. The number of cells were counted and plotted in GraphPad Prism with significance.

**Three-Dimensional Spheroid Assay**

SBC5 CisR, SBC5 conditional knockdown (KD) cells were seeded in a low attachment plate (24 well) at a density of 5000 cells per well in supplemented RPMI media which is regularly used to culture these cells. After 72 hours of growth the cells formed spheroids. Spheroid growth was monitored using a microscope. Once the spheroids were ready, the different treatments were initiated. In case of the conditional KD cells, doxycycline was added to induce the expression of FOXM1 shRNA which eventually degrades FOXM1 mRNA. The spheroids were treated for a total of another 72 hours and after the treatment, spheroids were imaged. The total number of spheroids were counted for all the treatment groups and data was analyzed using ImageJ. Eventually the spheroid data was used to plot graphs in GraphPad Prism with subsequent t-tests.

**Lentivirus production and transfection**

The lentiviral particles used in this experiment were generated in HEK293T cells after co-transfection with Lipofectamine-2000. The third-generation packaging plasmids used in this experiment were bought from Addgene and they include- pMDLg/pRRE plasmid for HIV-1 GAG-POL (Addgene#12251), pRSV-Rev plasmid for Rev (Addgene#12253) and pMD2.G plasmid for the production of viral envelope protein (Addgene#12253). These three packaging plasmids were co-transfected with luciferase plasmid (LP466-100, GeneCopoeia, MD, USA) for the generation of lentiviruses. To obtain the lentiviral particles, culture supernatant was collected at two timepoints after transfection- 48 hours and 72 hours. After collecting the supernatant, it was centrifuged at 1250 rpm for 3 minutes to remove the cell debris and later were sterile filtered using 0.45-micron filters. Then the lentiviral particles were aliquoted in 1.5 ml Eppendorf tubes and stored at -80 °C for further use.

**Chromatin immunoprecipitation and PCR**

Chromatin immunoprecipitation experiment was performed using a high sensitivity chromatin immunoprecipitation (ChIP) kit from Abcam (ab185913) [36]. The protocol provided by the manufacturer was used to perform the entire experiment without any modifications. ChIP experiment was performed with 3 million cells for each group. However, fragmentation length was determined before initiating the ChIP reaction. Bioruptor Pico bath sonicator was used for the fragmentation of fixed DNA samples (from Diagenode). Multiple fragmentation cycles (5, 10,15 and 20) were utilized to generate DNA fragments of different lengths and optimum fragmentation time was determined by running the different samples in 2% agarose gel. 15 cycles of (1 cycle consists of 30 seconds on and 30 seconds off) sonication time gave us optimum fragment length of 100-700 base pairs with a peak size near 300 base pairs. ChIP samples were subsequently used to run PCR and qPCR reactions. Primers were ordered from IDT. PCR products were resolved in 2% agarose gel containing ethidium bromide. The gel was imaged using a Biorad Gel Doc XR+ imaging system.

**Flow cytometry**

1. ***Annexin-V/propidium iodide apoptosis analysis***

SCLC cells were grown in the presence and absence of FOXM1 inhibitors (FDI-6 and NB-73) for 48-72 h, and annexin-V/PI assay was performed as described previously []. Briefly, cells were trypsinized and washed two to three times with PBS and stained with Cy5-Annexin-V (Cat# 559934, B.D., Biosciences), and propidium iodide according to the manufacturer’s instructions. The samples were analyzed by flow cytometry with FlowJo software.

1. ***Cell surface expression of Immune markers***

T-cells were co-cultured with cancer cells. After 48 hours, cells were collected and washed with FACS buffer. The cells were stained using a live/dead stain (UV Brilliant blue) followed by staining with respective antibodies (CD8, CD4, CD25, and CD69) at 4⁰C for 1 hour. Following the antibody incubation the cells were washed twice with FACS buffer and were fixed with fixation buffer at 4⁰ C for 20 min. Stained cells were analyzed using multicolor flow cytometry and data was analyzed using FACS DIVA and FloJo.

**Immunoblot analysis**

Around 2 X 106 cells were collected and washed with ice-cold PBS, and processed for protein extraction using cell lysis buffer (50 mM Tris-HCl pH 7.5, 250 mM NaCl, 1% NP-40, 0.5% sodium deoxycholate, 0.1% sodium dodecyl sulfate) containing protease and phosphatase inhibitors (Roche, Cat #: 11836153001; Sigma, PhosSTOP Cat#: 4906837001). The isolated proteins were quantified using Bio-Rad D/C protein estimation kit. The selected protein samples were boiled in Laemmli’s sample buffer, and 40-60μg of protein was resolved by electrophoresis using 10% SDS-PAGE. The resolved proteins were transferred to PVDF, blocked in 5% non-fat milk in PBS with 0.1% Tween-20 (PBS-T) for 1 h, and incubated with the respective primary antibodies **(Supplementary Table 1)** overnight at 4°C. Next day, the membranes were washed thrice in PBS-T and further probed with appropriate HRP-conjugated secondary antibodies (Invitrogen, diluted at 1:3000-1:4000 in PBS-T with 3% non-fat milk) for 1 h at room temperature. The membrane were washed in PBS-T and the blots were processed for the detection of chemiluminescence using luminol reagent (Thermo Fisher Scientific, Cat #: 1859698) on iBright imaging system (Thermo Fisher Scientific, Waltham, MA, USA).

**Immunohistochemistry**

Tissue sections from the resected organs (lung, liver) of NSG and RPM mice bearing metastatic tumors or xenografts from SCLC, and SCLC tissue microarrays (US Bio Lab, Rockville, MD) were baked overnight at 58 ⁰C, deparaffinized in xylene, and rehydrated using higher to lower concentration gradient of alcohol (5 min each). The tissue slides were incubated with hydrogen peroxide in methanol (3% solution) to quench the endogenous peroxide activity, washed in running tap water for 5-10 min, The antigen retrieval was performed for 10-15 mins in 0.05 M citrate buffer (pH 6.0) with 0.5% PBST in Decloaking chamber, Biocare. Blocking was performed with 2.5% NHS (ImmPRESS Universal antibody kit; Vector Laboratories, Burlingame, CA) for 2 h at room temperature. The blocked tissue samples were incubated with respective primary antibodies overnight at 4⁰C following which the tissue slides were washed four times each with PBST and PBS (10 min per wash). The tissues were then incubated for 2 h with anti-mouse/rabbit HRP-conjugated secondary antibodies (Vector Laboratories, ImmPRESS Universal antibody kit for IHC). Finally, the sample slides were washed four times each with PBST and PBS (10 min each). The chromogen substrate 3, 3’-diaminobenzidine solution (DAB substrate kit; Vector Laboratories) was used to develop the color. The slides were counterstained with nuclear stain, hematoxylin. After which the slides were washed with water and dehydrated with ethanol gradient followed by two xylene washes. The tissues were dried and mounted using Permount (Vector Laboratories, Burlingame, CA). The images were captured at Leica Digital Microscope (DMC4500).

**Details of antibodies and reagents used in the study.**

| **KEY RESOURCES** | | |
| --- | --- | --- |
| **REAGENT** | **SOURCE** | **IDENTIFIER** |
| **Antibodies** | | |
| FOXM1, WB- 1:1000, IHC-1:400, Chromatin IP-1:100 | Cell Signaling Technology | Cat#20459 |
| ERK1/2, WB-1:1000 | Cell Signaling Technology | Cat#9102 |
| p-ERK (Thr-202/Tyr-204), WB:1:1000 | Cell Signaling Technology | Cat#4370 |
| Ki67, IHC-1:100 | Abcam | Cat#ab92742 |
| CD31, IHC-1:200 | Cell Signaling Technology | Cat#77699 |
| β-actin, WB-1:10,000 | Sigma | Cat#A1978 |
| CD8 IF-1:200 | Thermo Fisher Scientific | Cat# MAI-145 |
| PDL1 IF- 1:200 | Thermo Fisher Scientific | Cat#14598285 |
| Secondary Antibody IF- Anti Rat AF488 | Jackson Laboratories | Cat#112545003 |
| Brilliant Violet 785™ anti-human CD8 Antibody | Biolegend | Cat#344740 |
| Pacific Blue™ anti-human CD69 Antibody | Biolegend | Cat#310920 |
| APC anti-human CD25 | Biolegend | Cat#985810 |
|  |  |  |
| **Kits and chemicals** | | |
| miRNeasy serum/plasm kit | Qiagen | Cat # 217184 |
| Total RNA isolation kit mirVana™ | Invitrogen™, Thermo Scientific, USA | Cat#AM1561 |
| ImmPRESS Universal Polymer kit, Peroxidase | Vector Laboratories | Cat#MP-7500 |
| DAB Peroxidase (HRP) Substrate Kit (with Nickel), 3,3’-diaminobenzidine | Vector Laboratories | Cat#SK-4100 |
| FDI-6 | Selleckchem | Cat#S9689 |
| LIVE/DEAD™ Fixable Blue Dead Cell Stain Kit, for UV excitation | Invitrogen | Cat#L34962 |
| Abcam High sensitivity ChIP Kit | Abcam | Cat#ab185913 |
|  |  |  |

**ChIP Primers**

| Aurora B Kin. F | GCA ACG AAA GGT CTA TTG GTG G |
| --- | --- |
| Aurora B Kin. R | TCT AAC TTC TCT GCC CGA TGG AG |
